# Supplementary material for: Childbirth Acquired Perineal Trauma study (CHAPTER): a UK prospective cohort study protocol
Source: HighWire-hosted journal article supplement (doi:10.1136/bmjopen-2024-086724), 2024-05-01

S2 Appendix: Distress Pathway

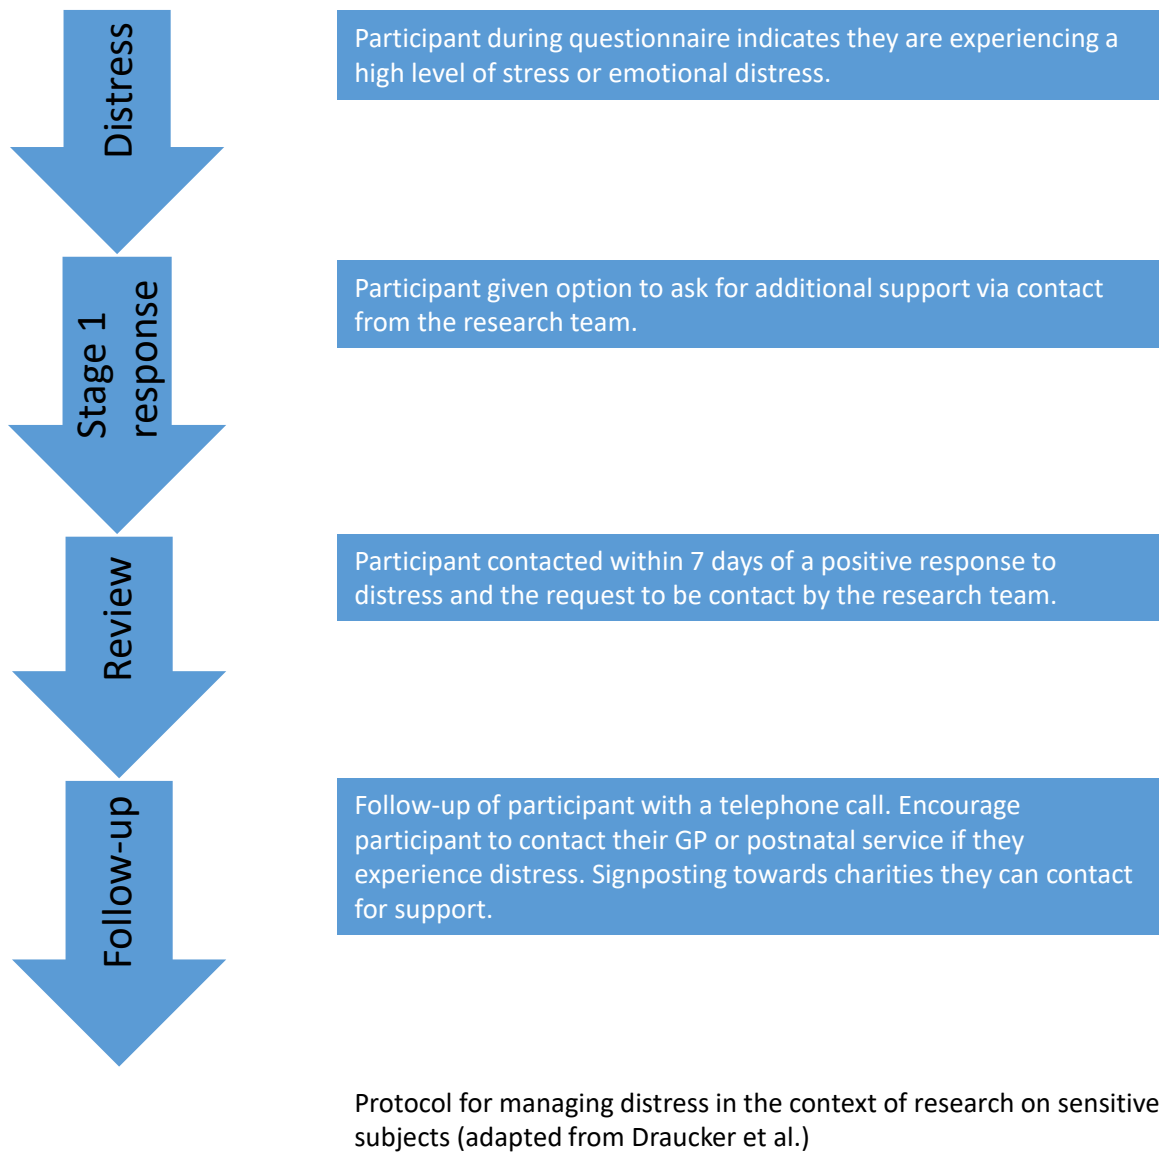

Supplement: bmjopen-2024-086724supp002_data_supplement.pdf [file bmjopen-2024-086724supp002_data_supplement.pdf]
